# Supplementary material
Source: Research Square preprint supplement (doi:10.21203/rs.3.rs-9771936/v1)
Supplement: Supplementary file 1 [file 45b04fd31dd1f89399995c4e.docx]

**Appendix**

Figure 1 presents the comparison between Methods 1, 2, and 3 with the SPIV data for Case 10 (Reynolds number = 44,500).


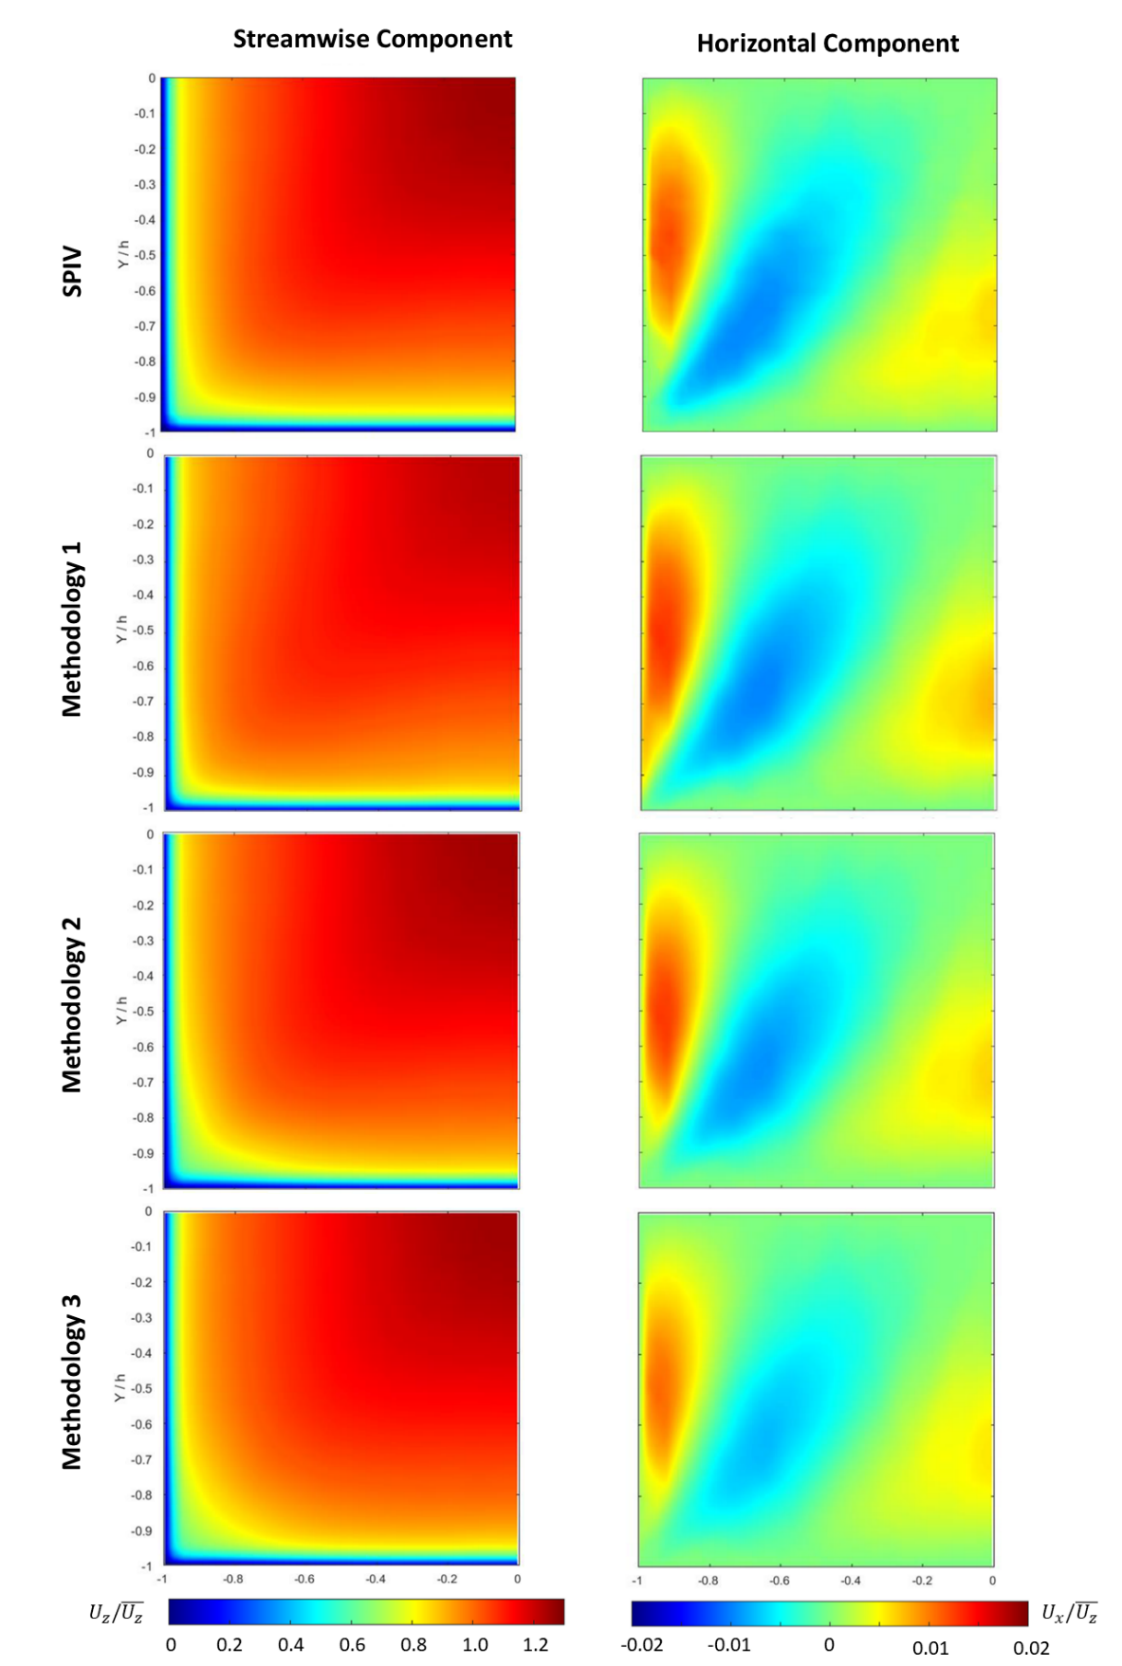


Figure 1 – Comparison of the different data-driven Methods with the SPIV data for Case 10 (Reynolds number = 44,500) for the normalized streamwise (Uz) and horizontal (Ux) components of the velocity vector
